# Supplementary material
Source: PubMed Central journal article supplement (PMC3215815)

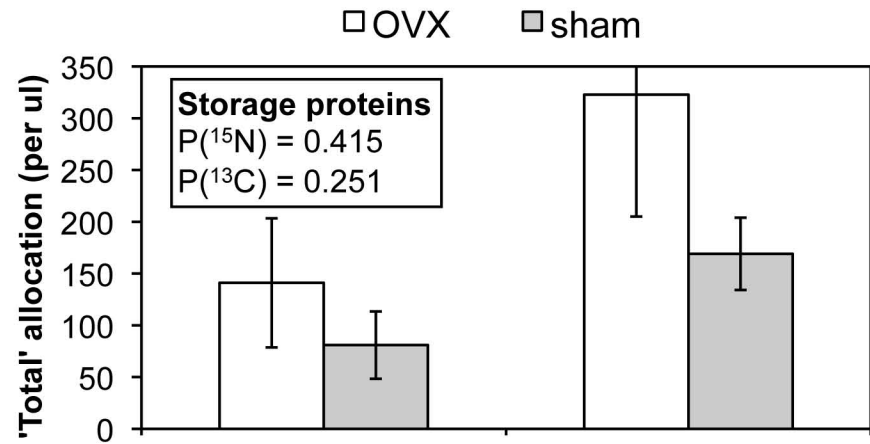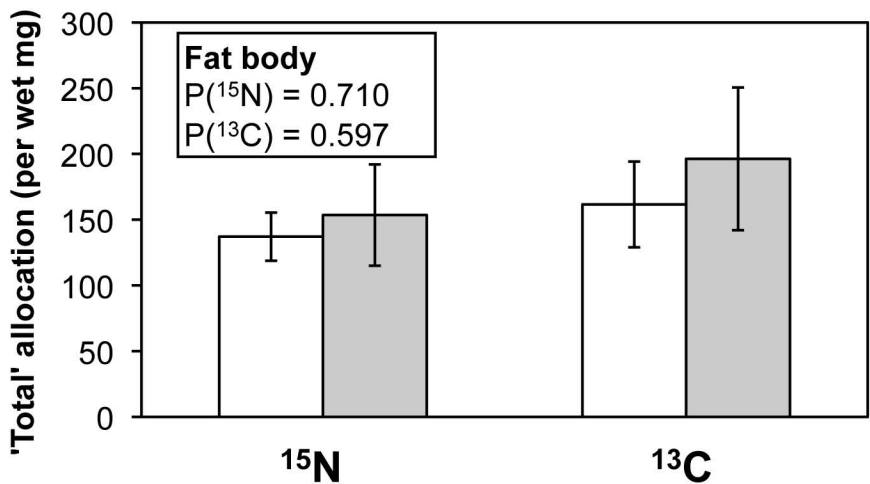

Supplement: NIHMS317279-supplement-Supp_Fig_S1.pdf [file NIHMS317279-supplement-Supp_Fig_S1.pdf]
